# Supplementary material
Source: PubMed Central journal article supplement (PMC5714463)
Supplement: 1519FileS1.pdf [file 1519FileS1.pdf]

**Enya et al. File S1: Animal count data**

Animal count data for Fig. 2A

| <i>w<sup>1118</sup>/Y</i> |    |    |    |    |     |     |     |
|---------------------------|----|----|----|----|-----|-----|-----|
| hours AEL                 | 24 | 48 | 72 | 96 | 120 | 144 | 168 |
| L1                        | 60 | 6  | 0  | 0  | 0   | 0   | 0   |
| L2                        | 0  | 54 | 1  | 0  | 0   | 0   | 0   |
| L3                        | 0  | 0  | 59 | 56 | 20  | 6   | 0   |
| pupa                      | 0  | 0  | 0  | 0  | 32  | 45  | 53  |
| death                     | 0  | 0  | 0  | 4  | 8   | 9   | 7   |

Animal count data for Fig. 2B

| <i>Gclc<sup>46</sup>/Y</i> |    |    |    |    |     |     |     |     |     |     |
|----------------------------|----|----|----|----|-----|-----|-----|-----|-----|-----|
| hours AEL                  | 24 | 48 | 72 | 96 | 120 | 144 | 168 | 192 | 216 | 240 |
| L1                         | 60 | 14 | 0  | 0  | 0   | 0   | 0   | 0   | 0   | 0   |
| L2                         | 0  | 41 | 49 | 43 | 35  | 32  | 25  | 19  | 14  | 13  |
| L3                         | 0  | 0  | 0  | 0  | 0   | 0   | 0   | 0   | 2   | 2   |
| pupa                       | 0  | 0  | 0  | 0  | 0   | 0   | 0   | 0   | 0   | 0   |
| death                      | 0  | 5  | 11 | 17 | 25  | 28  | 35  | 41  | 44  | 45  |

Animal count data for Fig. 2F

|               | <i>w<sup>1118</sup>/Y</i> |    | <i>Gclc<sup>46</sup>/Y</i> |    |    |    |    |
|---------------|---------------------------|----|----------------------------|----|----|----|----|
|               | -                         | -  | -                          | 1  | 5  | 10 | 20 |
| ascorbic acid | -                         | 1  | 1                          | 1  | 1  | 1  | 1  |
| L1            | 0                         | 0  | 0                          | 0  | 0  | 0  | 0  |
| L2            | 0                         | 1  | 43                         | 56 | 53 | 54 | 24 |
| L3            | 56                        | 55 | 0                          | 0  | 3  | 5  | 1  |
| pupa          | 0                         | 0  | 0                          | 0  | 0  | 0  | 0  |
| death         | 4                         | 4  | 17                         | 4  | 4  | 1  | 36 |

Animal count data for Fig. 3A

|       | <i>w<sup>1118</sup>/Y</i> |     |     | <i>Gclc<sup>46</sup>/Y</i> |     |     |
|-------|---------------------------|-----|-----|----------------------------|-----|-----|
|       | -                         | 20E | CLR | -                          | 20E | CLR |
| L1    | 0                         | 0   | 0   | 0                          | 0   | 0   |
| L2    | 0                         | 0   | 0   | 43                         | 27  | 35  |
| L3    | 56                        | 56  | 56  | 0                          | 19  | 14  |
| pupa  | 0                         | 0   | 0   | 0                          | 0   | 0   |
| death | 4                         | 4   | 4   | 17                         | 14  | 11  |

Animal count data for Fig. 3B

|       | $w^{1118}/Y$ |     |     | $Gclc^{46}/Y$ |     |     |
|-------|--------------|-----|-----|---------------|-----|-----|
|       | -            | 20E | CLR | -             | 20E | CLR |
| L1    | 0            | 0   | 0   | 0             | 0   | 0   |
| L2    | 0            | 0   | 0   | 25            | 18  | 24  |
| L3    | 0            | 3   | 1   | 0             | 16  | 11  |
| pupa  | 53           | 50  | 53  | 0             | 0   | 0   |
| death | 7            | 7   | 6   | 35            | 26  | 25  |

Animal count data for Fig. 4A

| $w^{1118}/Y$ | LSF |    |    |    |     |     |     |     |
|--------------|-----|----|----|----|-----|-----|-----|-----|
| hours AEL    | 24  | 48 | 72 | 96 | 120 | 144 | 168 | 192 |
| L1           | 60  | 10 | 0  | 0  | 0   | 0   | 0   | 0   |
| L2           | 0   | 49 | 21 | 2  | 0   | 0   | 0   | 0   |
| L3           | 0   | 0  | 27 | 46 | 40  | 32  | 24  | 27  |
| pupa         | 0   | 0  | 0  | 0  | 0   | 0   | 2   | 2   |
| death        | 0   | 1  | 12 | 12 | 20  | 28  | 34  | 31  |

| $w^{1118}/Y$ | LSF + CLR |    |    |    |     |     |     |     |
|--------------|-----------|----|----|----|-----|-----|-----|-----|
| hours AEL    | 24        | 48 | 72 | 96 | 120 | 144 | 168 | 192 |
| L1           | 60        | 4  | 0  | 0  | 0   | 0   | 0   | 0   |
| L2           | 0         | 55 | 24 | 0  | 0   | 0   | 0   | 0   |
| L3           | 0         | 0  | 30 | 52 | 48  | 15  | 3   | 0   |
| pupa         | 0         | 0  | 0  | 0  | 1   | 30  | 42  | 45  |
| death        | 0         | 1  | 6  | 8  | 11  | 15  | 15  | 15  |

Animal count data for Fig. 4B

| $Gclc^{46}/Y$ | LSF |    |    |    |     |     |     |     |
|---------------|-----|----|----|----|-----|-----|-----|-----|
| hours AEL     | 24  | 48 | 72 | 96 | 120 | 144 | 168 | 192 |
| L1            | 60  | 58 | 27 | 33 | 33  | 10  | 3   | 3   |
| L2            | 0   | 0  | 3  | 7  | 6   | 1   | 0   | 0   |
| L3            | 0   | 0  | 0  | 0  | 0   | 0   | 0   | 0   |
| pupa          | 0   | 0  | 0  | 0  | 0   | 0   | 0   | 0   |
| death         | 0   | 2  | 30 | 20 | 21  | 49  | 57  | 57  |

Animal count data for Fig. 4B (continued)

| <i>Gclc</i> <sup>46/Y</sup> | LSF + CLR |    |    |    |     |     |     |     |
|-----------------------------|-----------|----|----|----|-----|-----|-----|-----|
| hours AEL                   | 24        | 48 | 72 | 96 | 120 | 144 | 168 | 192 |
| L1                          | 60        | 44 | 8  | 5  | 1   | 0   | 0   | 0   |
| L2                          | 0         | 6  | 30 | 41 | 40  | 20  | 6   | 3   |
| L3                          | 0         | 0  | 0  | 0  | 0   | 0   | 0   | 0   |
| pupa                        | 0         | 0  | 0  | 0  | 0   | 0   | 0   | 0   |
| death                       | 0         | 10 | 22 | 14 | 19  | 40  | 54  | 57  |

Animal count data for Fig. 6A

| hours AEL | 24 | 48 | 72 | 96 | 120 | 144 | 168 |
|-----------|----|----|----|----|-----|-----|-----|
| L1        | 60 | 18 | 0  | 0  | 0   | 0   | 0   |
| L2        | 0  | 42 | 27 | 0  | 0   | 0   | 0   |
| L3        | 0  | 0  | 28 | 53 | 51  | 20  | 1   |
| pupa      | 0  | 0  | 0  | 0  | 6   | 32  | 52  |
| death     | 0  | 0  | 5  | 7  | 3   | 8   | 7   |

Animal count data for Fig. 6B

| hours AEL | 24 | 48 | 72 | 96 | 120 | 144 | 168 |
|-----------|----|----|----|----|-----|-----|-----|
| L1        | 60 | 58 | 34 | 0  | 0   | 0   | 0   |
| L2        | 0  | 0  | 13 | 23 | 11  | 4   | 0   |
| L3        | 0  | 0  | 0  | 23 | 35  | 43  | 14  |
| pupa      | 0  | 0  | 0  | 0  | 0   | 0   | 0   |
| death     | 0  | 2  | 13 | 14 | 14  | 13  | 46  |

Animal count data for Fig. 6B'

|       | -  | 20E | CLR |
|-------|----|-----|-----|
| L1    | 0  | 0   | 0   |
| L2    | 4  | 1   | 6   |
| L3    | 43 | 17  | 46  |
| pupa  | 0  | 17  | 0   |
| death | 13 | 25  | 8   |

Animal count data for Fig. 6C

| hours AEL | 24 | 48 | 72 | 96 | 120 | 144 | 168 |
|-----------|----|----|----|----|-----|-----|-----|
| L1        | 60 | 58 | 34 | 20 | 5   | 0   | 0   |
| L2        | 0  | 0  | 6  | 18 | 36  | 40  | 11  |
| L3        | 0  | 0  | 0  | 0  | 0   | 0   | 0   |
| pupa      | 0  | 0  | 0  | 0  | 0   | 0   | 0   |
| death     | 0  | 2  | 20 | 22 | 19  | 20  | 49  |

Animal count data for Fig. 6C'

|       | -  | 20E | CLR |
|-------|----|-----|-----|
| L1    | 20 | 0   | 0   |
| L2    | 18 | 28  | 42  |
| L3    | 0  | 7   | 6   |
| pupa  | 0  | 0   | 0   |
| death | 20 | 25  | 12  |

Animal count data for Fig. 6D

| hours AEL | 24 | 48 | 72 | 96 | 120 | 144 |
|-----------|----|----|----|----|-----|-----|
| L1        | 60 | 54 | 38 | 22 | 10  | 0   |
| L2        | 0  | 0  | 0  | 0  | 2   | 0   |
| L3        | 0  | 0  | 0  | 0  | 0   | 0   |
| pupa      | 0  | 0  | 0  | 0  | 0   | 0   |
| death     | 0  | 6  | 22 | 38 | 48  | 60  |

Animal count data for Fig. 6D'

|       | -  | 20E | CLR |
|-------|----|-----|-----|
| L1    | 22 | 14  | 25  |
| L2    | 0  | 3   | 4   |
| L3    | 0  | 1   | 0   |
| pupa  | 0  | 0   | 0   |
| death | 38 | 42  | 31  |

Animal count data for Fig. 7A

|          | $w^{1118}/Y$ |    |    |    | $Gclc^{46}/Y$ |    |    |    |
|----------|--------------|----|----|----|---------------|----|----|----|
| PQ       | +            | +  | -  | -  | +             | +  | -  | -  |
| 20E      | -            | +  | -  | +  | -             | +  | -  | +  |
| survivor | 62           | 67 | 93 | 94 | 28            | 39 | 86 | 82 |
| dead     | 58           | 53 | 27 | 26 | 92            | 81 | 34 | 38 |
