# Supplementary material
Source: PubMed Central journal article supplement (PMC5714463)
Supplement: 1519TableS1.pdf [file 1519TableS1.pdf]

**Enya et al. Table S1. Viability of PG-specific *Gclc* RNAi animals.**

The number of viable *phm-GAL4 UAS-dicer2 UAS-Gclc-IR* adults was scored. *UAS-Gclc-IR* lines are obtained from Vienna Drosophila RNAi Center (see Materials and Methods). Males of these *UAS-Gclc-IR* flies were crossed with *UAS-dicer2; phm-GAL4/TM6* females. Values in parentheses indicate the number of viable control flies (*UAS-dicer2/UAS-Gclc-IR; +/TM6*) from the parental strains in the same experimental batches.

| <i>UAS-Gclc-IR</i> lines | Number of adults |
|--------------------------|------------------|
| #108022KK                | 87 (92)          |
| #33512GD                 | 124 (153)        |
